# Supplementary material
Source: publisher figshare collection journal article supplement (https://gsajournals.figshare.com/ndownloader/files/28456908)
Supplement: Supplementary file 1 [file 28456908]

## Sheet: Supplemental_Table_S1
Supplemental Table S1: GC content is elevated in primate X palindrome arms relative to flanking sequence. P-values are from chi-square test with Yates correction.
Human							Chimpanzee							Rhesus macaque
Palindrome	Arm 1 length (bp)	Flanking length (bp)	Arm 1 GC (%)	Flanking GC (%)	p-value		Palindrome	Arm 1 length (bp)	Flanking length (bp)	Arm 1 GC (%)	Flanking GC (%)	p-value		Palindrome	Arm 1 length (bp)	Flanking length (bp)	Arm 1 GC (%)	Flanking GC (%)	p-value
P2	24849	83517	44.07	39.22	1.8e-266		P2	25099	82455	43.95	39.36	2.25e-257		P2	42623	91615	44.32	39.06	0
P3	36398	83392	47.08	37.52	0		P3	36247	83212	47.1	37.53	0		P3	34782	96783	47.07	37.85	0
P6	37939	203740	48.05	43.91	0		P6	34932	196227	48.89	44.14	0		P6	15564	221983	48.34	44.79	0
P7	26581	140783	43.69	38.27	0		P7	28529	140226	44.2	38.26	0		P7	24152	187629	43.93	38.3	0
P8	57336	56225	45.86	47.62	3.5e-07		P8	53145	65431	45.94	47.86	1.05e-14		P8	38447	89961	47.77	45.91	0
P9	119125	92765	43.19	40.21	9.95e-92		P9	119105	88148	43.08	39.74	1.07e-116		P9	81966	152376	43.61	40.54	0
P10	9193	101002	50.36	42.21	1.34e-142		P10	7591	100457	46.62	42.05	2.27e-163		P10	6561	117616	46.14	41.55	1.65e-172
P11	140582	176247	41.72	39.47	0		P11	160191	185640	41.63	39.19	0		P11	105994	188318	42.46	39.55	0
P21	46811	88685	46.83	42.73	8.19e-160		P21	36887	94054	46.6	42.53	6.08e-227		P21	21963	89617	44.35	42.31	8.97e-267
P24	10050	92241	61.11	50.83	3.14e-138		P24	10712	90734	59.62	50.86	2.49e-63		P24	7673	90082	61.05	50.28	0
P25	35448	288582	53.01	48.46	3.76E-310		P25	34937	289807	52.74	47.95	2.79e-303		P25	101313	273906	51.23	47.45	0
P26	50037	250270	41.54	37.61	7.62e-155		P26	46893	240223	41.2	37.91	2.17e-138		P26	45037	198305	41.74	37.11	0
